# Supplementary material for: Genome-wide analysis of the Thaumatin-like gene family in Qingke (Hordeum vulgare L. var. nudum) uncovers candidates involved in plant defense against biotic and abiotic stresses
Source: Front Plant Sci. 2022 Aug 17;13:912296. doi: 10.3389/fpls.2022.912296 (PMC9428612; doi:10.3389/fpls.2022.912296)
Supplement: Supplementary file 3 [file Table_2.XLS]

## Sheet: Sheet1
Supplementary Table S1. Information of the transcriptomic data retrieved from NCBI database used for expression profile of Qingke PR-5 genes.
Stress information	Sample description	BioProject	Run_accession	Tissue
powdery mildew infection	G7-0h_1	PRJNA471777	SRR7177893	leaves
powdery mildew infection	G7-0h_2	PRJNA471777	SRR7177894	leaves
powdery mildew infection	G7-0h_3	PRJNA471777	SRR7177895	leaves
powdery mildew infection	G7-168h_1	PRJNA471777	SRR7177896	leaves
powdery mildew infection	G7-168h_2	PRJNA471777	SRR7177897	leaves
powdery mildew infection	G7-168h_3	PRJNA471777	SRR7177898	leaves
powdery mildew infection	G7-36h_1	PRJNA471777	SRR7177899	leaves
powdery mildew infection	G7-36h_2	PRJNA471777	SRR7177900	leaves
powdery mildew infection	G7-36h_3	PRJNA471777	SRR7177891	leaves
powdery mildew infection	G7-6h_1	PRJNA471777	SRR7177892	leaves
powdery mildew infection	G7-6h_2	PRJNA471777	SRR7177907	leaves
powdery mildew infection	G7-6h_3	PRJNA471777	SRR7177908	leaves
powdery mildew infection	G7-72h_1	PRJNA471777	SRR7177909	leaves
powdery mildew infection	G7-72h_2	PRJNA471777	SRR7177910	leaves
powdery mildew infection	G7-72h_3	PRJNA471777	SRR7177903	leaves
powdery mildew infection	Z13-0h_1	PRJNA471777	SRR7177904	leaves
powdery mildew infection	Z13-0h_2	PRJNA471777	SRR7177905	leaves
powdery mildew infection	Z13-0h_3	PRJNA471777	SRR7177906	leaves
powdery mildew infection	Z13-168h_1	PRJNA471777	SRR7177901	leaves
powdery mildew infection	Z13-168h_2	PRJNA471777	SRR7177902	leaves
powdery mildew infection	Z13-168h_3	PRJNA471777	SRR7177884	leaves
powdery mildew infection	Z13-36h_1	PRJNA471777	SRR7177883	leaves
powdery mildew infection	Z13-36h_2	PRJNA471777	SRR7177886	leaves
powdery mildew infection	Z13-36h_3	PRJNA471777	SRR7177885	leaves
powdery mildew infection	Z13-6h_1	PRJNA471777	SRR7177888	leaves
powdery mildew infection	Z13-6h_2	PRJNA471777	SRR7177887	leaves
powdery mildew infection	Z13-6h_3	PRJNA471777	SRR7177890	leaves
powdery mildew infection	Z13-72h_1	PRJNA471777	SRR7177889	leaves
powdery mildew infection	Z13-72h_2	PRJNA471777	SRR7177882	leaves
powdery mildew infection	Z13-72h_3	PRJNA471777	SRR7177881	leaves
dehydration stress	Z772_stress_0h	PRJNA391461	SRR5818282	leaves
dehydration stress	Z772_stress_1h	PRJNA391461	SRR5818283	leaves
dehydration stress	Z772_stress_5h	PRJNA391461	SRR5818285	leaves
dehydration stress	Z013_stress_0h	PRJNA391461	SRR5818284	leaves
dehydration stress	Z013_stress_1h	PRJNA391461	SRR5818281	leaves
dehydration stress	Z013_stress_5h	PRJNA391461	SRR5818280	leaves
cold stress	H8CK1-1	PRJNA322603	SRR3579931	leaves
cold stress	H8CK1-2	PRJNA322603	SRR3579933	leaves
cold stress	H8CK2-1	PRJNA322603	SRR3579932	leaves
cold stress	H8CK2-2	PRJNA322603	SRR3581313	leaves
cold stress	H8CK3-1	PRJNA322603	SRR3581314	leaves
cold stress	H8CK3-2	PRJNA322603	SRR3581316	leaves
cold stress	H8T1-1	PRJNA322603	SRR3581317	leaves
cold stress	H8T1-2	PRJNA322603	SRR3581318	leaves
cold stress	H8T2-1	PRJNA322603	SRR3581321	leaves
cold stress	H8T2-2	PRJNA322603	SRR3581322	leaves
cold stress	H8T3-1	PRJNA322603	SRR3581329	leaves
cold stress	H8T3-2	PRJNA322603	SRR3581335	leaves
